# Supplementary material
Source: publisher site journal article supplement (https://www.dovepress.com/article/338840)
Supplement: Supplementary file 1 [file get_supplementary_file.php]

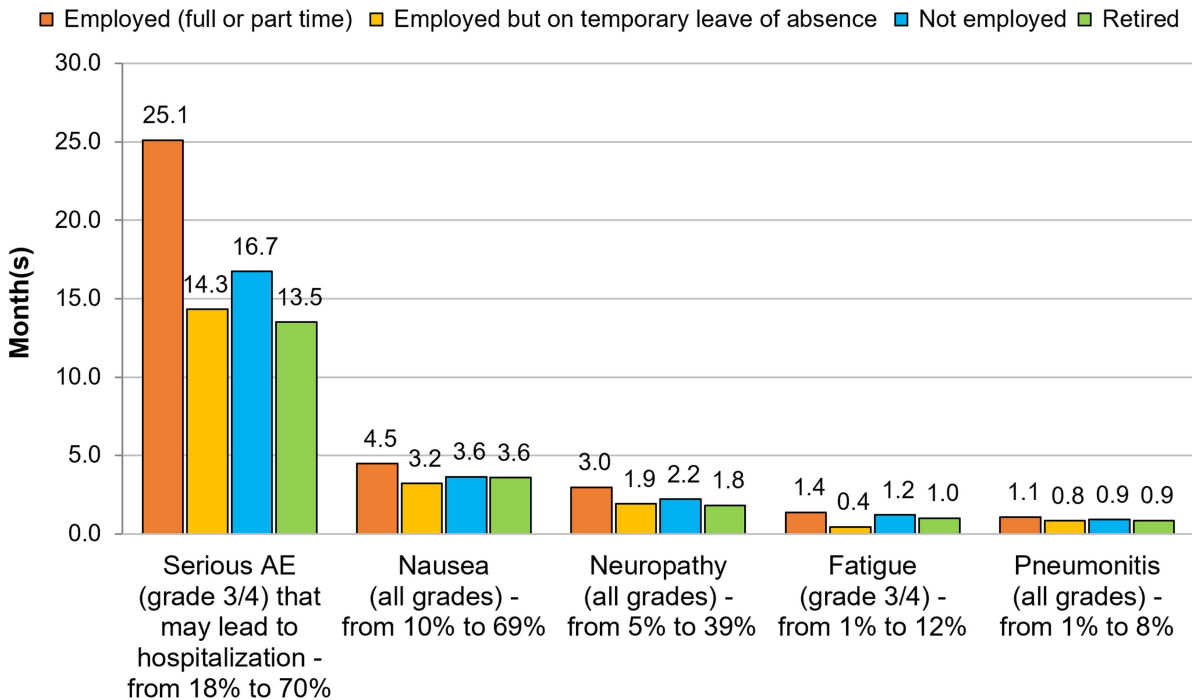

**Supplemental Figure 1** Increases in number of OS months needed to accept increases in toxicity levels by employment status: Patients.

**Abbreviations:** AE, adverse event.

**A**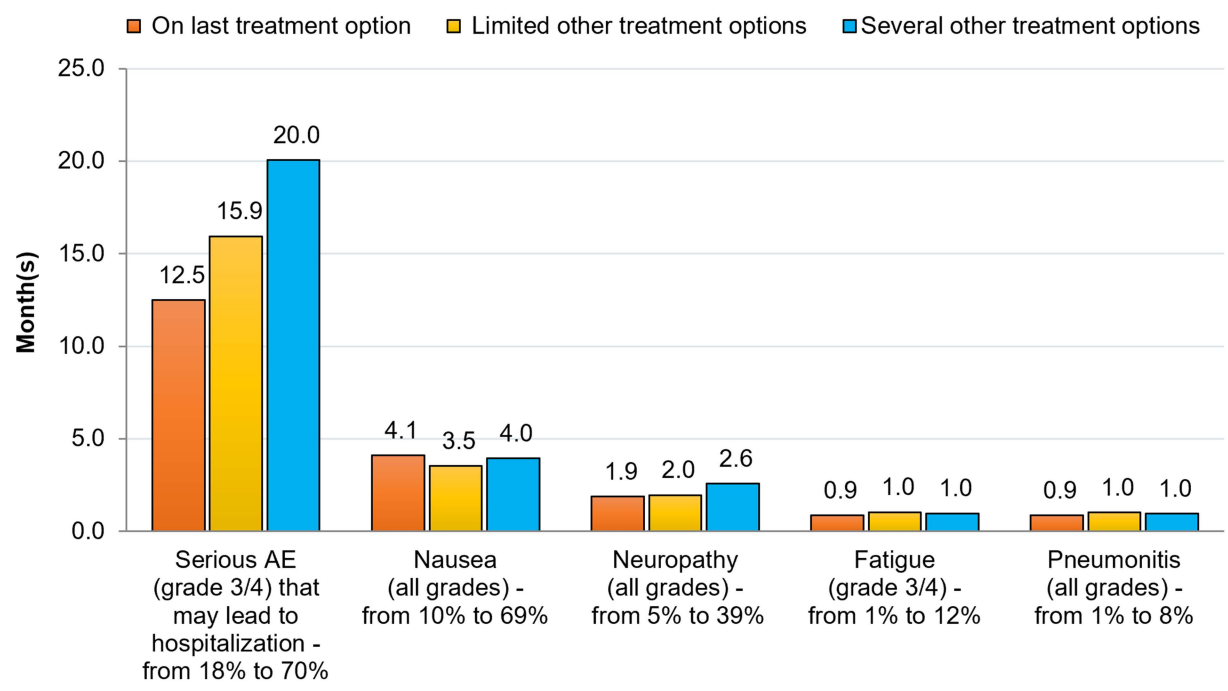**B**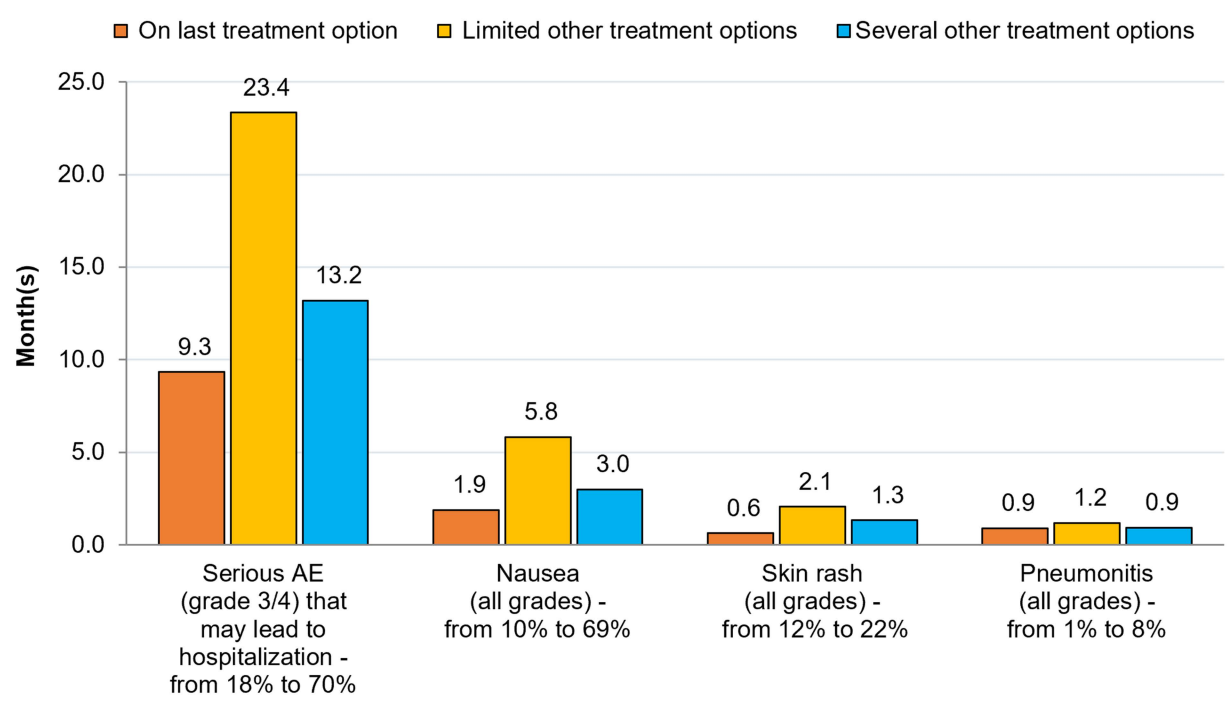

**Supplemental Figure 2** Increases in number of OS months needed to accept increases in toxicity levels by perception of future treatment options among (a) patients and (b) caregivers.

**Abbreviations:** AE, adverse event.
